# Supplementary material for: Cross-sectional assessment of Angiostrongylus cantonensis transmission risk mediated by invasive apple snails in Jiangsu Province of China
Source: Research Square preprint supplement (doi:10.21203/rs.3.rs-7316123/v1), 2025-08-21
Supplement: Supplementary file 1 [file 24069ecf440e5643e982174e.docx]

**Questionnaire on knowledge, attitudes, and practices (KAP) regarding *Pomacea canaliculata* in Jiangsu province**

Questionnaire Number: __________

Address: ________City, ________District/(City)/County, ________Sub-district/Township, ________Community/Village

**1. Basic information**

1.1 Gender: ① Male ② Female

1.2 Age: __________ years old

1.3 Ethnic Group: ___________

1.4 Education Level: ① Primary school and below ② Junior high school ③ High school or technical secondary school ④ Junior college and above

1.5 Occupation: ① Farmer ② Worker ③ Medical Worker ④ Self-employed ⑤ Student ⑥ Others (please specify: ____________)

1.6 Marital Status: ① Unmarried ② Married

**2. Knowledge on prevention and control**

**K1** Is *Pomacea canaliculata* (apple snail) an invasive species?

① Yes ② No

**K2** What color are the eggs of *Pomacea canaliculata*?

① Pink ② White ③ Transparent

**K3** Does *Pomacea canaliculata* damage the ecological environment?

① Yes ② No

**K4** Does *Pomacea canaliculata* harm crops?

① Yes ② No

**K5** Can eating raw or undercooked Pomacea canaliculata meat cause parasitic infections?

① Yes ② No

**3. Attitudes toward prevention and control**

**A1** How severe do you think the health risks posed by *Pomacea canaliculata* are?

① Very severe ②No risk

**A2** If you knew that eating raw snail meat (e.g., cold snail salad) carries a risk of parasitic infection, would you still consume it?

① Yes ② No

**A3** Do you want to learn more about the risks of *Pomacea canaliculata*?

① Yes ② No

**A4** Would you share the knowledge about *Pomacea canaliculata* with family or others?

① Yes ② No

**4. Practices in prevention and control**

**P1** Have you ever consumed raw or undercooked snail meat?

① Yes ② No

**P2** Have you directly handled *Pomacea canaliculata* with bare hands?

① Yes ② No

**P3** Do you regularly drink untreated water?

① Yes ② No

**P4** When eating raw fruits/vegetables, do you consume them without washing?

① Yes ② No

**P5** Do you use separate cutting boards and knives for raw and cooked foods?

① Yes ② No

**P6** If you find *Pomacea canaliculata*, would you report it to authorities?

① Yes ② No

**P7** Have you ever reported sightings of *Pomacea canaliculata* via the Apple Snail Inspector (ASI) app?

① Yes ② No
